# Supplementary material for: Prevalence and Levels of Anti-SARS-CoV-2 Antibodies in the Eswatini Population and Subsequent Severity of the Fourth COVID-19 Epidemic Wave
Source: MDPI journal article supplement (doi:10.3390/covid4030021), 2024-02-20
Supplement: s1 [file s1]

Archive with 1 entries (1 files):
- covid-2840875-supplementary.pdf
