# Supplementary material for: Prevalence and Levels of Anti-SARS-CoV-2 Antibodies in the Eswatini Population and Subsequent Severity of the Fourth COVID-19 Epidemic Wave
Source: MDPI journal article supplement (doi:10.3390/covid4030021), 2024-02-20
Supplement: s1 [file s1 › covid-2840875-supplementary.pdf]

**Supplementary material:**

**Prevalence of anti-SARS-CoV-2 antibodies in the Eswatini population and subsequent severity of the fourth Covid-19 epidemic wave.**

**Supplementary Appendix**

| <b>Contents</b>                                                                                                                | <b>Page</b> |
|--------------------------------------------------------------------------------------------------------------------------------|-------------|
| <b>Supplementary Methods</b>                                                                                                   | <b>2</b>    |
| Study setting and sero-survey                                                                                                  | 2           |
| Decoupling of cases                                                                                                            | 2           |
| <b>Supplementary Tables</b>                                                                                                    |             |
| Supplementary Table S1: Time period over which sero-survey was undertaken in different sub-districts in Gauteng, South Africa. | 3           |
| <b>Supplementary Figures</b>                                                                                                   |             |
|                                                                                                                                |             |
| <b>Supplementary References</b>                                                                                                |             |

## **SUPPLEMENTARY METHODS**

### **Study setting and sero-survey**

The vaccination programme in Eswatini was initiated in March 2021 and by May 2021 after administering 35 000 doses (3% of the national population), vaccination stopped until August 2021 due to limited vaccine supply. Currently, approximately 40% of the Eswatini population ever received a Covid-19 vaccine.

## **RESULTS**

### **Decoupling of cases**

Stratifying analyses by region indicated Shiselweni's first wave was the mildest peaking approximately 4 weeks after the onset of the first wave in the other 3 regions. Additionally, Shiselweni had the highest number of cases during the third compared to the fourth wave, unlike the other 3 regions, and had the earliest decoupling of cases from deaths and hospitalizations evident as early as during the third wave (Figure 1B-E).

## **DISCUSSION**

### **Study limitations:**

Similar to other resource constraints settings, limitations in Covid-19 testing may have inadvertently led to under-reporting of cases and over estimation of case fatality rates. The converse is true where under-reporting of deaths could have under-estimated mortality, excess mortality estimates are helpful in addressing under ascertainment of Covid-19 related deaths and such data are not available in Eswatini.

Variability in case numbers and disease severity by region may partly be driven by differences in access to health care and testing facilities by region. There could be differences in testing rates across the waves which may have contributed to differences in case numbers across the four waves.

Another limitation may be in over-emphasizing decoupling of Covid-19 cases from hospitalisations and deaths if infection and severity in earlier waves systematically selected against more susceptible individuals during the first two waves resulting in fewer high-risk individuals in subsequent waves.

**Supplementary Table S1: Cumulative reported Covid-19 cases, hospitalizations and recorded deaths in Eswatini by region and Covid-19 wave**

| Outcomes                                                | Wave 1                       | Wave 2                       | Wave 3                       | Wave 4                        | TOTAL  |
|---------------------------------------------------------|------------------------------|------------------------------|------------------------------|-------------------------------|--------|
| Period of case wave                                     | Feb. 24, 2020 - Oct. 12 2020 | Oct. 13, 2020 – May 24, 2021 | May 2,5 2021 – Nov. 21, 2021 | Nov. 22, 2021 – June 23, 2022 |        |
| <b>Eswatini</b>                                         |                              |                              |                              |                               |        |
| Recorded cases -no†                                     | 6008                         | 7399                         | 13492                        | 26583                         | 53482  |
| Cumulative case rate per 100,000 population             | 517.9                        | 637.8                        | 1163                         | 2291.4                        | 4610.1 |
| Proportion of total cumulative cases, %                 | 11.2                         | 13.8                         | 25.2                         | 49.7                          | 100.0  |
| Hospitalizations– no.‡                                  | 1871                         | 3876                         | 3436                         |                               | 9183   |
| Cumulative hospitalisation rate per 100,000 population  | 161.3                        | 334.1                        | 296.2                        |                               | 791.6  |
| Reported cases: recorded Covid-19 hospitalisation ratio | 3.2                          | 1.9                          | 3.9                          |                               | 5.8    |
| Recorded deaths in wave – no.                           | 179                          | 536                          | 530                          | 167                           |        |
| Cumulative recorded death rate per 100,000 population   | 15.4                         | 46.2                         | 45.7                         | 11.3                          |        |
| Reported cases: recorded Covid-19 deaths ratio          | 33.6                         | 13.8                         | 25.5                         | 159.2                         |        |
| Case Fatality Risk, %                                   | 3.0                          | 7.2                          | 3.9                          | 0.6                           | 0.0    |
| <b>Hhohho</b>                                           |                              |                              |                              |                               |        |
| Recorded cases -no†                                     | 1447                         | 1658                         | 3784                         |                               | 6889   |
| Cumulative case rate per 100,000 population             | 428.3                        | 490.7                        | 1120                         |                               | 2039   |
| Proportion of total cumulative cases, %                 | 21.0                         | 24.1                         | 54.9                         | 0.0                           | 1      |
| Hospitalizations– no.‡                                  | 727                          | 879                          | 818                          |                               |        |
| Cumulative hospitalisation rate per 100,000 population  | 215.2                        | 260.1                        | 242.1                        |                               |        |
| Reported cases: recorded Covid-19 hospitalisation ratio | 2.0                          | 1.9                          | 4.6                          |                               |        |
| Recorded deaths in wave – no.                           | 97                           | 141                          | 143                          |                               |        |
| Cumulative recorded death rate per 100,000 population   | 28.7                         | 41.7                         | 42.3                         |                               |        |
| Reported cases: recorded Covid-19 deaths ratio          | 14.9                         | 11.8                         | 26.5                         |                               |        |
| Case Fatality Risk, %                                   | 6.7                          | 8.5                          | 3.8                          |                               | 0.0    |
| <b>Lubombo</b>                                          |                              |                              |                              |                               |        |
| Recorded cases -no†                                     | 1795                         | 1653                         | 1812                         |                               | 5260   |
| Cumulative case rate per 100,000 population             | 827.6                        | 762.1                        | 835.4                        |                               |        |
| Proportion of total cumulative cases, %                 | 0.3                          | 0.3                          | 0.3                          | 0                             | 1      |
| Hospitalizations– no.‡                                  | 297                          | 532                          | 371                          |                               | 1200   |
| Cumulative hospitalisation rate per 100,000 population  | 136.9                        | 245.3                        | 171                          |                               | 553.2  |
| Reported cases: recorded Covid-19 cases ratio           | 6.0                          | 3.1                          | 4.9                          |                               | 4.4    |
| Recorded deaths in wave – no.                           | 10                           | 76                           | 29                           |                               |        |

|                                                          |       |       |        |      |
|----------------------------------------------------------|-------|-------|--------|------|
| Cumulative recorded death rate per 100,000 population    | 4.6   | 35    | 13.4   |      |
| Reported cases: recorded Covid-19 deaths ratio           | 179.5 | 21.8  | 62.5   |      |
| Case Fatality Risk, %                                    | 0.6   | 4.6   | 1.6    | 0.0  |
| <b>Manzini</b>                                           |       |       |        |      |
| Recorded cases -no†                                      | 2281  | 2926  | 3102   | 8309 |
| Cumulative case rate per 100,000 population              | 609.6 | 781.9 | 829    |      |
| Proportion of total cumulative cases, %                  | 0.3   | 0.4   | 0.4    | 0    |
| Hospitalizations– no.‡                                   | 465   | 1431  | 1693   | 1    |
| Cumulative hospitalisation rate per 100,000 population   | 124.3 | 382.4 | 452.4  |      |
| Reported cases: recorded Covid-19 hospitalisations ratio | 4.9   | 2.0   | 1.8    |      |
| Recorded deaths in wave – no.                            | 60    | 233   | 234    |      |
| Cumulative recorded death rate per 100,000 population    | 16.0  | 62.3  | 62.5   |      |
| Reported cases: recorded Covid-19 deaths ratio           | 38.0  | 12.6  | 13.3   |      |
| Case Fatality Risk, %                                    | 0.03  | 0.08  | 0.08   | 0.00 |
| <b>Shiselweni</b>                                        |       |       |        |      |
| Recorded cases -no†                                      | 485   | 1162  | 4794   | 6441 |
| Cumulative case rate per 100,000 population              | 209.8 | 502.7 | 2073.9 |      |
| Proportion of total cumulative cases, %                  | 8     | 18    | 74     | 0    |
| Hospitalizations– no.‡                                   | 382   | 1034  | 554    | 100  |
| Cumulative hospitalisation rate per 100,000 population   | 165.3 | 447.3 | 239.6  |      |
| Reported cases: recorded Covid-19 hospitalisations ratio | 1.3   | 1.1   | 8.7    |      |
| Recorded deaths in wave – no.                            | 12    | 86    | 124    |      |
| Cumulative recorded death rate per 100,000 population    | 5.2   | 37.2  | 53.6   |      |
| Reported cases: recorded Covid-19 deaths ratio           | 40.4  | 13.5  | 38.7   |      |
| Case Fatality Risk, %                                    | 2.5   | 7.4   | 2.6    | 0.0  |

Covid-19 waves were defined as wave 1 Feb. 24, 2020 - Oct. 12 2020; wave 2 Oct. 13, 2020 – May 24, 2021; wave 3 May 2,5 2021 – Nov. 21, 2021 and wave 4 Nov. 22, 2021 – June 23, 2022.

Case fatality risk was calculated as number of deaths from total cases and ratio of reported cases: reported deaths was calculated as the inverse of case fatality risk

#### **SUPPLEMENTARY REFERENCES**

1. Madhi SA, Kwatra G, Myers JE, et al. Population Immunity and Covid-19 Severity with Omicron Variant in South Africa. *New Eng J Med* 2022;386:1314-26.
